# Supplementary material for: Evaluation of the Use of an Inorganic Bone Matrix in the Repair of Bone Defects in Rats Submitted to Experimental Alcoholism
Source: PubMed Central journal article supplement (PMC7040897; doi:10.3390/ma13030695), 2020-02-04
Supplement: materials-13-00695-s001.pdf [file materials-13-00695-s001.pdf]

Supplementary

# Evaluation of the Use of an Inorganic Bone Matrix in the Repair of Bone Defects in Rats Submitted to Experimental Alcoholism

Iris Jasmin Santos German <sup>1,2,3</sup>, Karina Torres Pomini <sup>1</sup>, Ana Carolina Cestari Bighetti <sup>1</sup>, Jesus Carlos Andreo <sup>1</sup>, Carlos Henrique Bertoni Reis <sup>4</sup>, André Luis Shinohara <sup>1</sup>, Geraldo Marco Rosa Júnior <sup>5,6</sup>, Daniel de Bortoli Teixeira <sup>4</sup>, Marcelie Priscila de Oliveira Rosso <sup>1</sup>, Daniela Vieira Buchaim <sup>4,7</sup> and Rogério Leone Buchaim <sup>1,4,\*</sup>

- <sup>1</sup> Department of Biological Sciences (Anatomy), Bauru School of Dentistry, University of São Paulo (USP), Bauru, São Paulo, 17012-901, Brazil; irish\_knaan@hotmail.com (I.J.S.G.); karinatorrespomini@gmail.com (K.T.P.); anacarolinacb25@gmail.com (A.C.C.B.); jcandreo@usp.br (J.C.A.); andreshinohara@yahoo.com.br (A.L.S.); marcelierosso@usp.br (M.P.O.R.)
  - <sup>2</sup> Department of Dentistry, Faculty of Health Science, Universidad Iberoamericana (UNIBE), Santo Domingo 10203, Dominican Republic
  - <sup>3</sup> Mother and Teacher Pontifical Catholic University (PUCMM), Santo Domingo, Dominican Republic;
  - <sup>4</sup> Postgraduate Program in Structural and Functional Interactions in Rehabilitation, University of Marília (UNIMAR), Marília, São Paulo, 17525-902, Brazil; carlosbtreis@yahoo.com.br (C.H.B.R.); daniel.dbt@hotmail.com (D.B.T.); danibuchaim@usp.br (D.V.B.)
  - <sup>5</sup> University of the Ninth of July (UNINOVE), Bauru, São Paulo, 17011-102, Brazil; geraldomjr@yahoo.com.br
  - <sup>6</sup> University of the Sacred Heart (USC), Bauru, São Paulo, 17011-160, Brazil
  - <sup>7</sup> Medical School, University Center of Adamantina (UniFAI), Adamantina, São Paulo, 17800-000, Brazil;
- \* Correspondence: [rogerio@fob.usp.br](mailto:rogerio@fob.usp.br)

Received: 13 December 2019; Accepted: 27 January 2020; Published: 3 February 2020

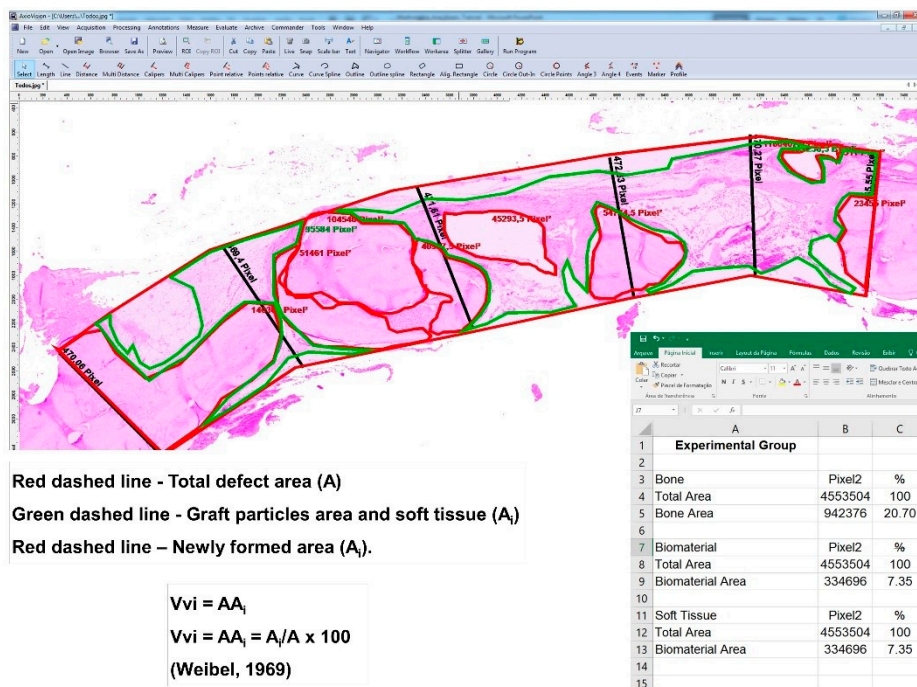

**Figure S1:** Representative image of the methodology used to quantify the area of newly formed bone, graft particles, by Axio Vision software.
